# Supplementary material for: Solvent mediated hierarchically porous NiCo-LDH decorated with Au nanoparticles for catalytic platforms
Source: Royal Society of Chemistry journal article supplement (doi:10.1039/d5cc06791j), 2026-01-01
Supplement: d5cc06791j1.pdf [file d5cc06791j1.pdf]

## Supporting Information

### Solvent mediated hierarchically porous NiCo-LDH decorated with Au nanoparticles for catalytic platforms

Vidya Chandrabose <sup>a</sup>, Varatharajan Dharmaraj <sup>b</sup>, Jae-Min Oh <sup>\*a</sup>, Sae Youn Lee <sup>\*a</sup>

<sup>a</sup> Department of Energy and Materials Engineering, Dongguk University, Seoul, 04620 Republic of Korea

<sup>b</sup> Department of Advanced Battery Convergence Engineering, Dongguk University, Seoul, 04620 Republic of Korea

\*Corresponding authors:

E-mail : [jaemin.oh@dongguk.edu](mailto:jaemin.oh@dongguk.edu), [saeyounlee@dongguk.edu](mailto:saeyounlee@dongguk.edu)

## Experimental section

### 1. Chemicals and reagents

Nickel chloride hexahydrate, Cobalt chloride hexahydrate, Polyethylene oxide (PEO), propylene oxide, Ethylene glycol (EG), Gold (III) chloride trihydrate, sodium borohydride, 4-nitrophenol (4-NP), Potassium hydroxide (KOH) was purchased from Sigma Aldrich, Korea.

### 2. Synthesis of NiCoLDHs and Au@NiCoLDH-EG

The NiCoLDHs were synthesised in a 3:1 molar ratio (Ni/Co) using 3 mL EG and 4 mL water as solvents. Metal precursors and PEO were dissolved in the EG-water mixture overnight. 1.82 mL propylene oxide was added to the above mixture at room temperature and allowed to age at 40 °C for 24 h. The mixture was then hydrothermally treated at 120 °C for 6 h. The obtained precipitate of NiCoLDH was thoroughly washed with water several times and lyophilised to collect the powder. The powdery LDH obtained was denoted as NiCoLDH-EG. For comparison, NiCoLDH-ET was synthesised using the same procedure using ethanol as solvent. The Au nanoparticles were decorated on NiCoLDH-EG by adding 20 mg Au precursor with 0.5 g NiCoLDH-EG in 20 mL EG and 80 mL water, and stirred for 24 h to form Au nanoparticles on NiCoLDH-EG. The sample obtained was washed several times with water and dried in oven at 40 °C, denoted as Au@NiCoLDH-EG.

### 3. Characterization

The crystalline structure was confirmed using a powder X-ray diffractometer (XRD) with a Bruker AXS D2 phaser using Ni-filtered Cu K $\alpha$  radiation ( $\lambda = 1.5406 \text{ \AA}$ ) at 50 kV at 40 mA. The diffraction patterns were recorded from  $2\theta$  from  $5^\circ$ – $80^\circ$ , with an interval of  $0.02^\circ$  and a scan speed of  $0.5^\circ/\text{min}$ . Crystallite size was calculated using Scherrer's equation (eq.1)

$$\tau = \frac{(0.9\lambda)}{B \cos \theta} \quad (1)$$

where  $\tau$  = crystallites size ( $\text{\AA}$ ),  $\lambda$  = wavelength of X-ray ( $1.5405 \text{ \AA}$ ),  $B$  = full-width at half-maximum (FWHM), and  $\theta$  = Bragg's angle.

The morphology was analysed by SEM (JSM-7100F, JEOL-USA Inc., Peabody, MA, USA) with an acceleration voltage of 15 kV, after sputtering with platinum for 1 min. The morphology and lattice fringes were analysed using high-resolution TEM (G2 ChemiSTEM Cs Probe, FEI, USA) operated at 200 kV. The zeta potential was obtained from ELS-Z1000 (Otsuka Electronics, Osaka, Japan) after dispersing in DI water at neutral conditions. The electronic state and elemental composition were examined using X-ray photoelectron spectroscopy (XPS, Thermo Scientific, Al K $\alpha$  source gun type, U.K.). Fourier transform infrared spectra (FT-IR) of the three catalysts were recorded in the attenuated total reflectance (ATR) mode using an FT/IR-4600 spectrometer (JASCO, Tokyo, Japan) over a spectral range of  $(4000\text{--}500) \text{ cm}^{-1}$ . Textural parameters obtained from Belsorpmini (BEL Japan, Inc., Osaka, Japan) after pretreatment of the sample at  $120^\circ\text{C}$  for 6 h. The specific surface area, mean pore diameter, and mean pore volume were calculated through the Brunauer–Emmett–Teller (BET) theory. Absorbance was monitored using UV–vis spectra, UV1800 (Shimadzu Corporation).

### 4. Reduction of 4-nitrophenol

The catalytic activity of three NiCoLDH catalysts was investigated by adding 30 mg  $\text{NaBH}_4$  in 30 mL aqueous solution of 4-nitrophenol ( $10^{-4} \text{ M}$ ). The absorption maxima of nitrophenolate ion at  $\sim 400 \text{ nm}$  were recorded using UV spectra. After that, 1 mg of the catalyst was added to the above mixture, and UV spectra were recorded in a time-dependent manner in the range of 200–500 nm. The electrocatalytic reduction of 4-NP was carried out using 10 mM 4-NP + 1 M KOH in three three-electrode system. The TON was calculated by using the equation  $\text{TON} = \text{moles of substrate converted} / \text{moles of active sites}$ , and TOF was calculated using the equation  $\text{TOF} = \text{moles of reacted substrate} / (\text{moles of active sites} \times \text{reaction time})$ .

### 5. Electrochemical Characterization

The electrochemical measurements were carried out on an Iviumstat workstation using a three-electrode cell setup with Saturated Calomel Electrode (SCE) as reference, Pt mesh as

counter electrode and a carbon cloth as working electrode. A total of 5 mg of the catalyst dispersed in a solution of 0.5 ml ethanol and 20  $\mu\text{L}$  of 5% Nafion, followed by sonicated for 30 mins to prepare catalyst ink. About 50  $\mu\text{L}$  of as prepared catalyst was drop-casted on both sides of 5 mm x 5 mm area of pretreated carbon cloth. The HER linear sweep voltammetry (LSV) measurements were performed at a scan rate of 10  $\text{mV s}^{-1}$  in  $\text{N}_2$ -saturated 1.0 M KOH electrolyte. The potentials were converted to the reversible hydrogen electrode (RHE) scale using Nernst equation:  $E_{\text{RHE}} = E_{\text{SCE}} + 0.241 + (0.059 \times \text{pH})$ . Tafel slope (b) values were calculated using the relation:  $\eta = a + b \log j$ . The electrochemical reduction of nitrophenol was studied using cyclic voltammetry (CV) at a scan rate of 100  $\text{mV s}^{-1}$  in an electrolyte containing 0.01 M 4-NP + 1.0 M KOH.

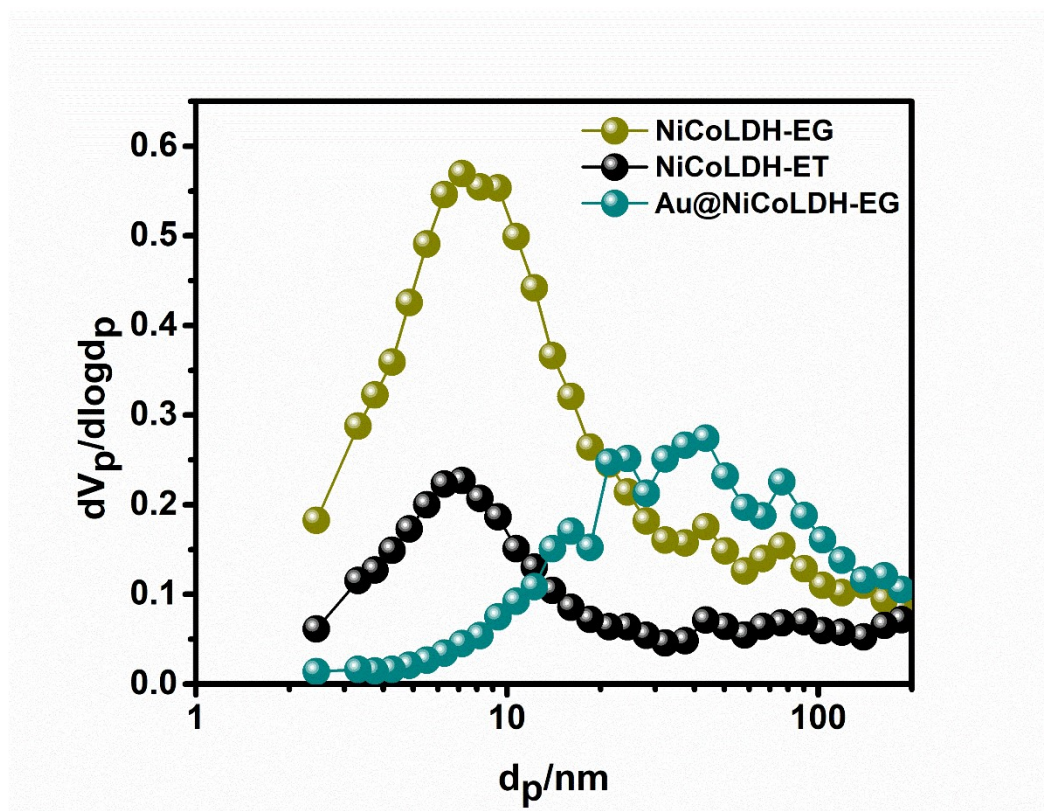

Fig. S1 BJH plots of NiCoLDH-ET, NiCoLDH-EG and Au@NiCoLDH-EG.

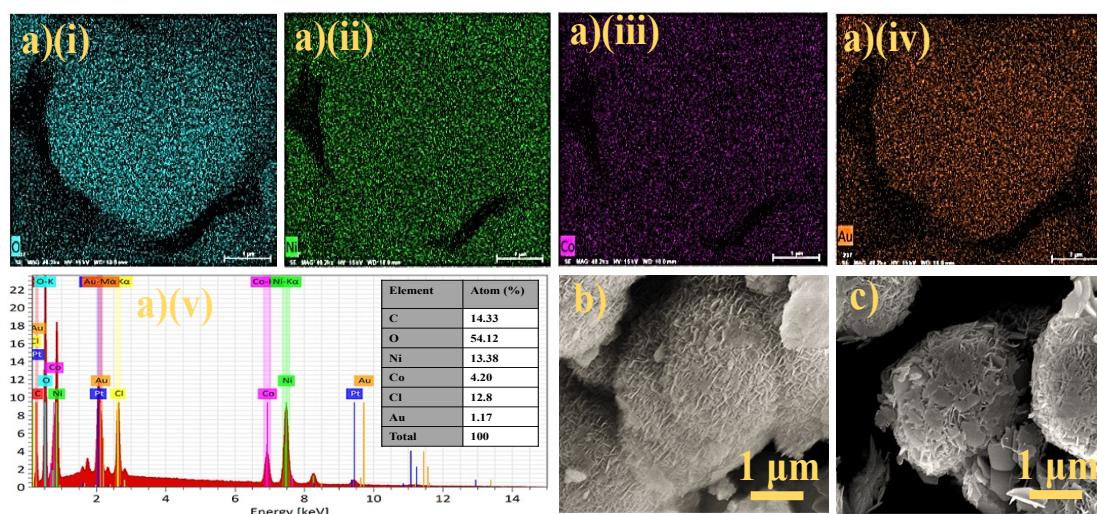

Fig. S2 (a(i-iv)) FE-SEM EDS mapping of Au@NiCoLDH-EG, (a(v)) EDS spectra, b) FE-SEM of NiCoLDH-EG and c) NiCoLDH-ET.

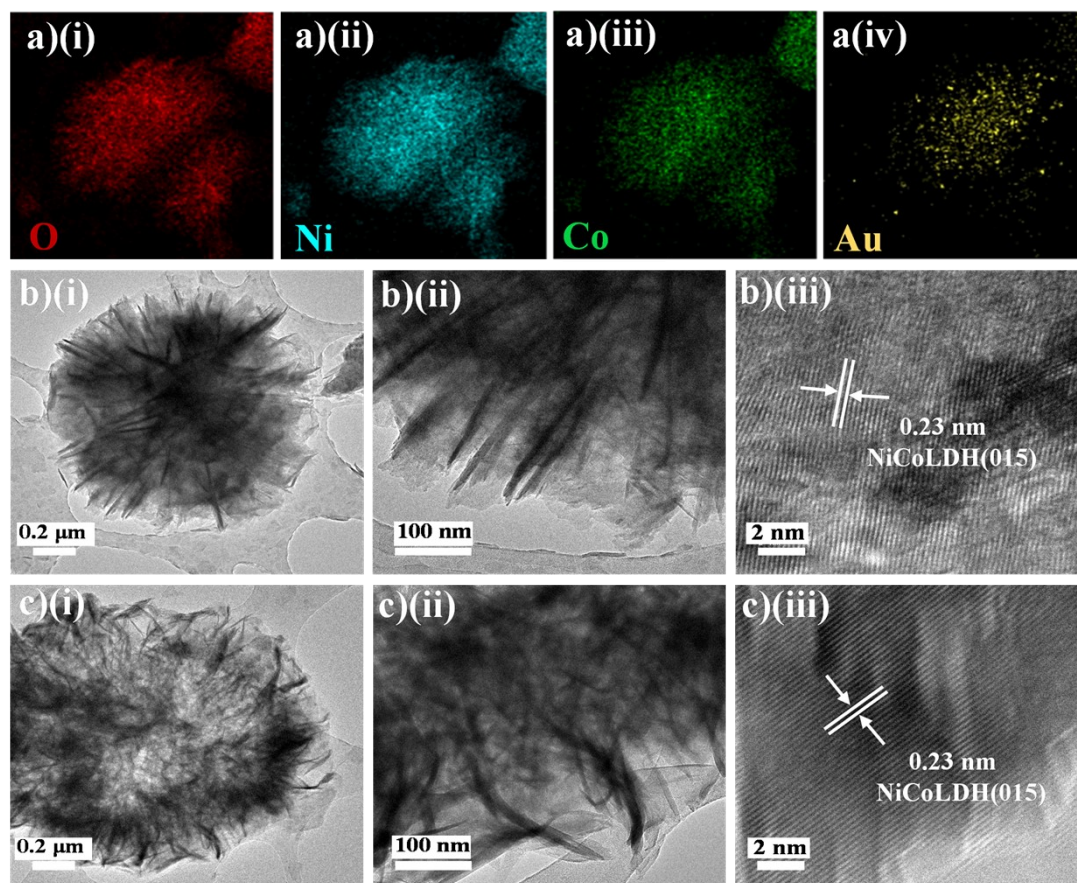

Fig. S3 (a(i- iv)) HR-TEM EDS mapping of Au@NiCoLDH-EG, (b)(i-iii) HR-TEM images of NiCoLDH-EG, and (c)(i-iii) NiCoLDH-ET.



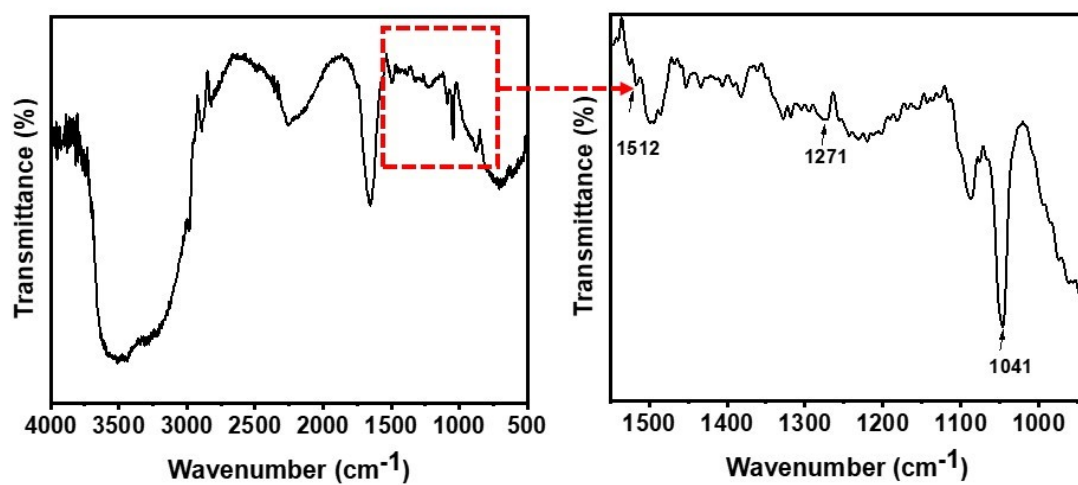

Fig. S4 FT-IR spectra of 4-AP (product after reduction of 4-NP)

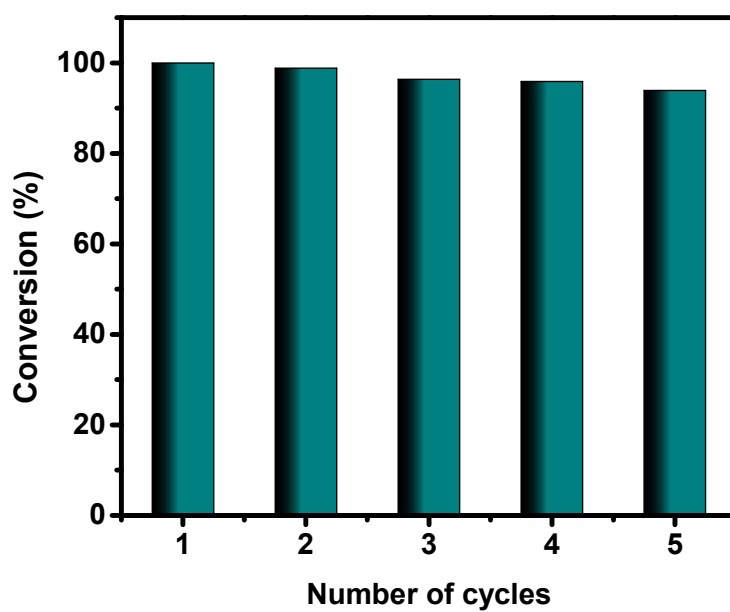

Fig. S5 Recyclability of Au@NiCoLDH-EG catalyst for the reduction of 4-NP.

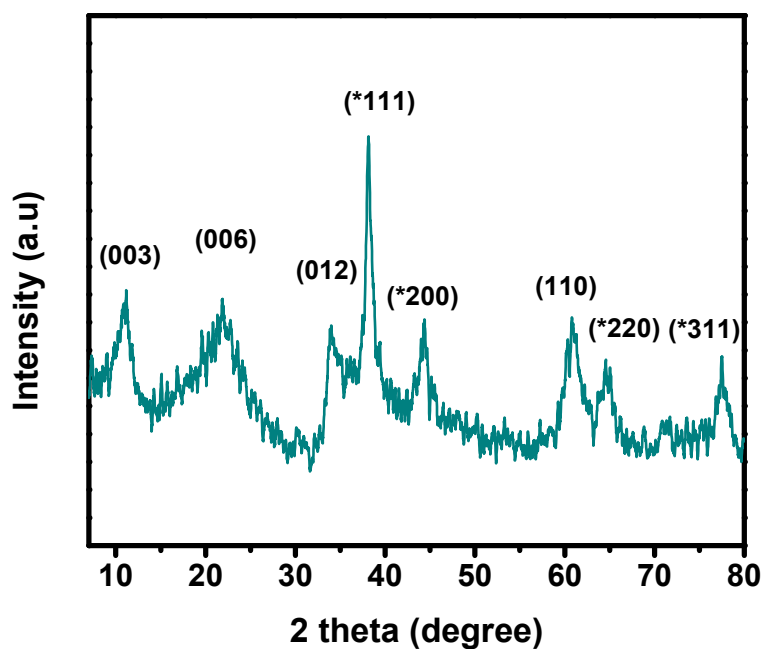

Fig. S6 XRD pattern of Au@NiCoLDH-EG after the catalytic reduction of 4-NP.

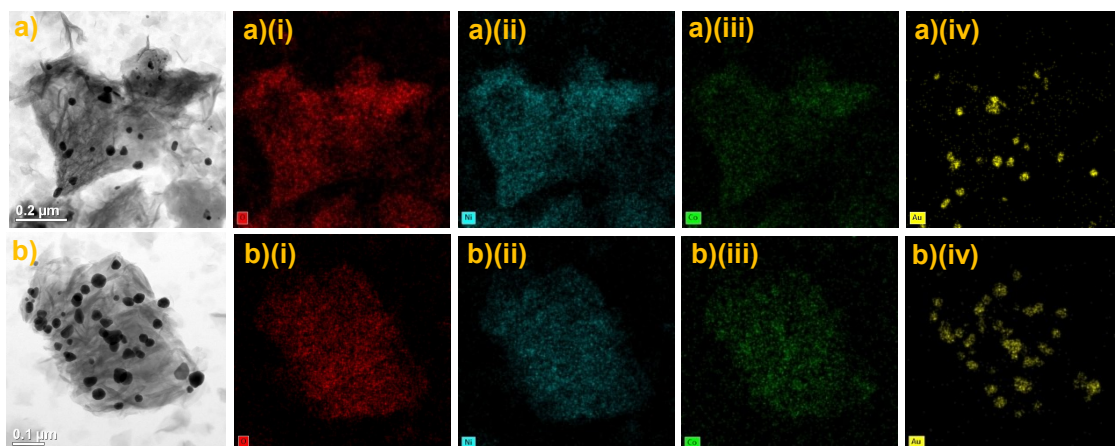

Fig. S7 (a)(i–iv) TEM image of Au@NiCoLDH-EG with EDS mapping after first cycle reduction of 4-NP. (b) (i–iv) TEM image of Au@NiCoLDH-EG with EDS mapping after second cycle reduction of 4-NP.

| Catalyst              | Specific surface area<br>(m <sup>2</sup> /g) | Rate constant<br>(min <sup>-1</sup> ) | Ref.      |
|-----------------------|----------------------------------------------|---------------------------------------|-----------|
| Au-Ag NPs             | 35.4                                         | $2.85 \times 10^{-2}$                 | 1         |
| Pt@Co-Al LDH          | 35                                           | 0.96                                  | 2         |
| Ni-Co LDH             |                                              | 0.03                                  | 3         |
| CuO/Cu <sub>2</sub> O | 15.4                                         | 0.42                                  | 4         |
| Ag NPs                | 60                                           | 0.28                                  | 5         |
| AuNPs/rGO             | 230.4                                        | 0.1176                                | 6         |
| Au/PDA                | 14.53                                        | 0.51                                  | 7         |
| NiMn LDH              | 56                                           | 0.231                                 | 8         |
| Ag/NiOH <sub>2</sub>  | -                                            | 0.28                                  | 9         |
| NiCoLDH-EG            | 280                                          | 0.21                                  | This work |
| Au@NiCoLDH-EG         | 60                                           | 0.65                                  | This work |

Table S1. Comparison table of catalysts used for reduction of 4-NP.

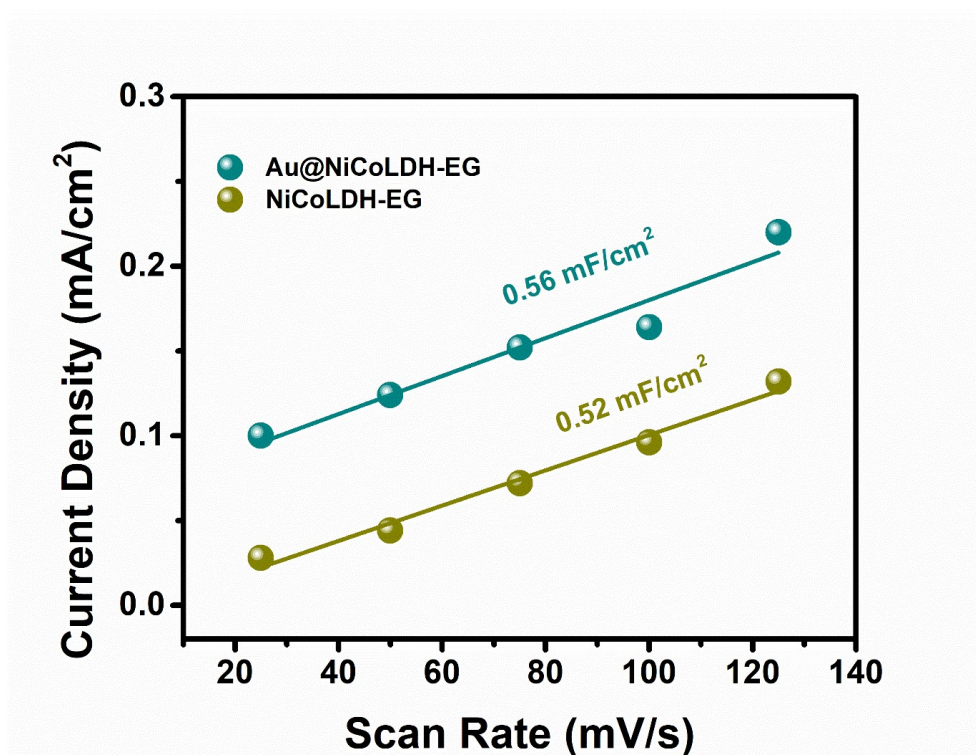

Fig. S8 Linear fit for double-layer capacitance of Au@NiCoLDH-EG and NiCoLDH-EG.

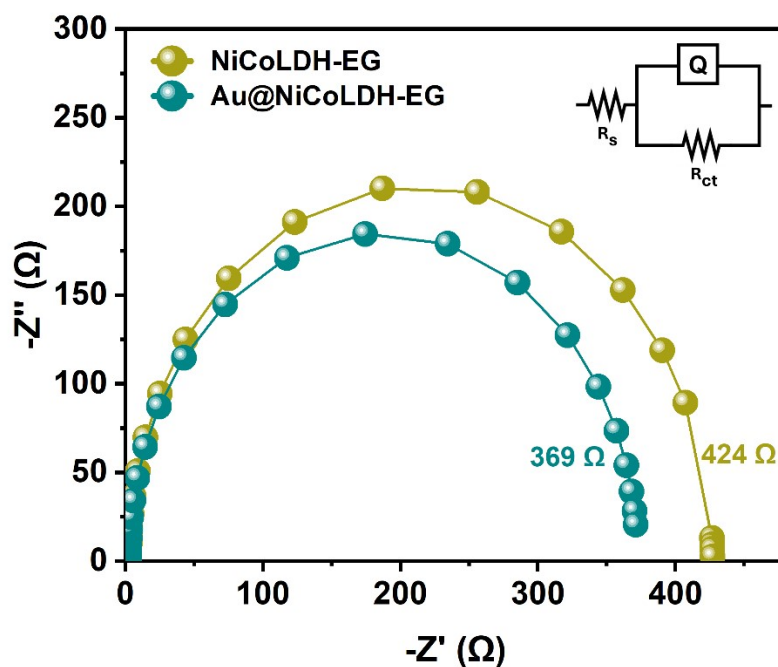

Fig. S9 EIS of Au@NiCoLDH-EG and NiCoLDH-EG.

## Reference

- 1 N. Arora, A. Mehta, A. Mishra and S. Basu, *Appl. Clay Sci.*, 2018, **151**, 1–9.
- 2 C. Xu, Y. Qiu, X. Yang, Z. Gao, Z. Wang, C. Liu, Y. Sun, J. Ma and L. Liu, *Crystals*, 2024, **14**, 284.
- 3 S. Kansal, P. Singh, S. Biswas, A. Chowdhury, D. Mandal, S. Priya, T. Singh and A. Chandra, *Int. J. Hydrogen Energy*, 2023, **48**, 21372–21382.
- 4 E. A. Mwafy, S. M. Mousa and G. T. El-Bassyouni, *Plasmonics*, 2025, **20**, 10273–10285.
- 5 Y. A. Aggour, E. R. Kenawy, M. Magdy and E. Elbayoumy, *RSC Adv.*, 2024, **14**, 30127–30139.
- 6 N. Li, F. Zhang, H. Wang and S. Hou, *Eng. Sci.*, 2019, **8**, 72–79.
- 7 L. Sun, Q. Xie, H. Jing, X. Liu, L. Zhao, X. Sun, B. Duan, C. Qi and H. Su, *Appl. Surf. Sci.*, 2025, **68**, 161376.
- 8 V. Sharma, M. Aman and S. Omar, *ACS Appl. Nano Mater.*, 2022, **5**, 15651–15664.
- 9 F. Bao, F. Tan, W. Wang, X. Qiao and J. Chen, *RSC Adv.*, 2017, **7**, 14283–14289.
